# Supplementary material
Source: bioRxiv or medRxiv preprint supplement (https://www.biorxiv.org/highwire/filestream/53398/field_highwire_adjunct_files/0/177626-1.pdf)
Supplement: Supplementary file [file 177626-1.pdf]

## Appendix

### Text S1

In the analysis of RNA-seq experiments different statistical filters are routinely used to identify differentially expressed genes, and the numbers of genes called differentially expressed can vary dramatically between filters. There is not necessarily one 'correct' list of differentially expressed genes, and the meaningfulness of the filter depends on the question asked. For the analysis shown in Figure 2A we have used the intersection of DESeq2 and an Intensity Difference Filter. This constitutes very stringent filtering for differential gene expression. To carefully explore the data, we also assessed differential expression using a combination of DESeq2 and a Dynamic Fold Change filters (for details see Methods) which resulted in over 1000 genes being called as differentially regulated. Interestingly, even in this larger group of genes functional enrichment analysis did not reveal any overrepresented gene ontology groups or biological pathways.

We thus asked whether the observed differential expression of the larger, less stringently filtered group was due to particular features of the genes or transcripts. Expression differences occurred at all expression levels (Suppl. Fig. S1A) and all genomic locations (Suppl. Fig. S1B). Interestingly, genes that showed higher expression in the TET3 expressing samples ('up' group) were significantly shorter than a random set of genes. Those which showed lower expression in the TET3 overexpressing samples ('down' group) tended to be longer although the difference was not statistically significant (Suppl. Fig. S1C). Notably, using transcript half-life data from Sharova et al. 2009, transcripts in the 'up' group were found to be more stable (Sup. Fig. S1D), and were highly enriched for transcripts with very long half-lives (>24 h, Suppl. Fig. S1E). We also examined if the groups of differentially expressed genes showed differences in their regulation by RNA polymerase pausing. Using a genome-wide nuclear run-on assay, Min and co-workers sorted ES cell promoters into four groups: transcribed and paused, transcribed and not paused, not transcribed and paused or not transcribed and not paused. We took their list of transcribed genes and intersected this with the 'up' and 'down' groups of Tet3 differentially regulated genes. Interestingly, the 'down' group was depleted for paused genes (Suppl. Fig. S1F).

Taken together, we conclude that TET3 does not specifically regulate a functionally related set of genes. Rather, TET3's global effects on transcription and total RNA levels affect genes differently depending on their transcriptional features. The observed expression differences are likely caused by different susceptibility of RNA steady-state levels to a global alteration.

Supplementary Figure S1

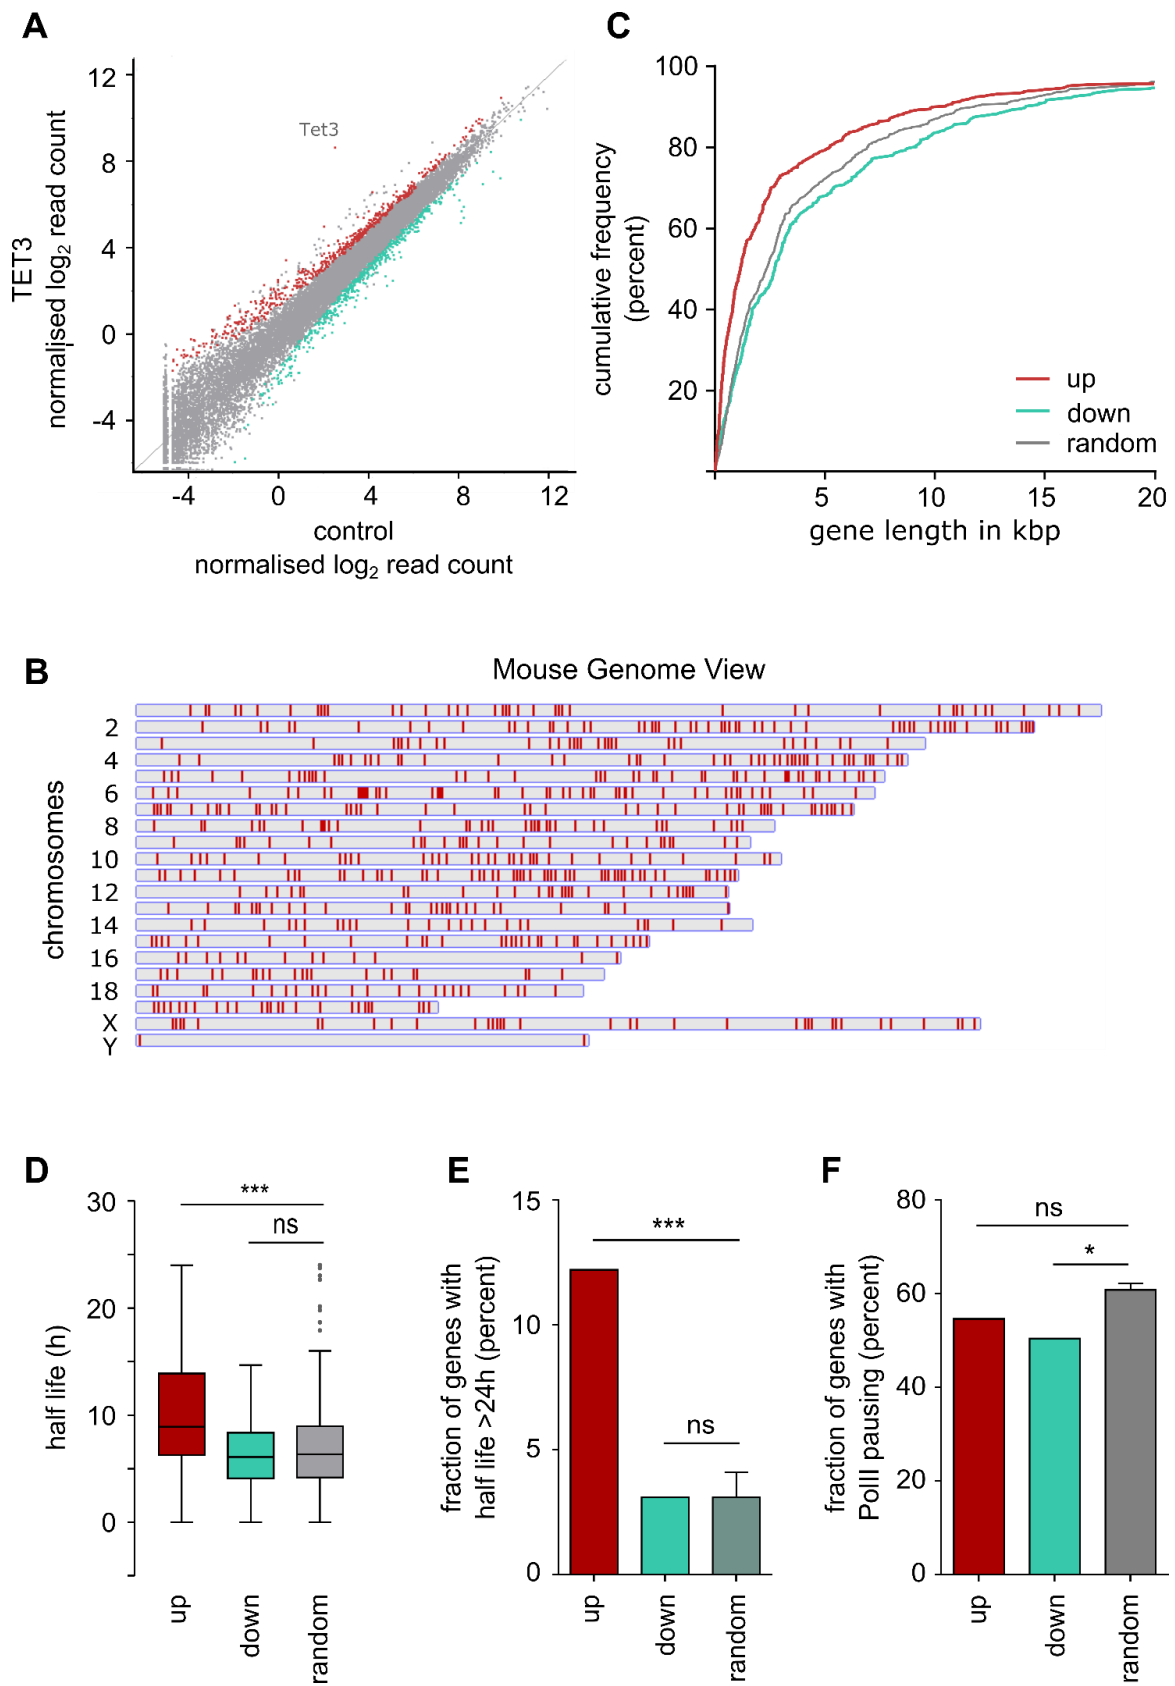

### Supplementary Figure S1 legend

A) Scatter plot showing RNA-seq data quantified as  $\log_2$  read count per mRNA normalised to the total number of reads. Each dot represents one transcript. Red dots: Significantly higher in TET3 expressing cells; turquoise dots: significantly less in TET3 expressing cells (intersection of DESeq2 and dynamic fold change filters, see methods).

B) Genome View showing the localisation of differentially regulated genes between TET3 expressing and control cells. Chromosomes are displayed as grey bars and location of genes by red stripes.

C) Cumulative frequency of lengths of genes that are relatively higher (up, red, n=431) or relatively lower (down, turquoise, n=410) in TET3 expressing cells, and randomly sampled genes (random, grey, n=500). 'Up' are significantly shorter than random genes (Kruskal-Wallis with Dunn's multiple comparisons post test,  $p=0.0004$ ).

D) Distribution of half-lives for genes that are expressed and are relatively higher (up, red, n=431) or relatively lower (down, turquoise, n=410) in TET3 expressing cells, and randomly sampled genes (random, grey, n=500) shown as Tukey box whisker plots. 'Up' genes have significantly longer half-lives than a random sample (Kruskal-Wallis with Dunn's multiple comparisons post test, \*\*\*  $p<0.001$ , ns: not significant). Transcript stability data was taken from (Sharova et al. 2009).

E) Fraction of genes per group (up, down, random) which have half-lives of 24 h or longer (data from (Sharova et al. 2009)). 'Up' genes were significantly enriched for transcripts with long half-lives ( $>24$ h, Chi-square test with Bonferroni correction, \*\*\*  $p=0.0004$ , ns: not significant).

F) Fraction of genes per group (up, down, regulated) which are transcribed and paused. Data for RNA polymerase II pausing was obtained from (Min et al. 2011): Class I genes are transcribed and not paused, class II genes are transcribed and paused. According to this classification 339 'up' genes, 343 'down' genes and 413 random genes are transcribed (class I + class II). Paused fractions of those were calculated. The 'down' group is depleted for paused genes (Chi-square test with Bonferroni correction, \*  $p=0.0344$ , ns: not significant).

## Supplementary Figure S2

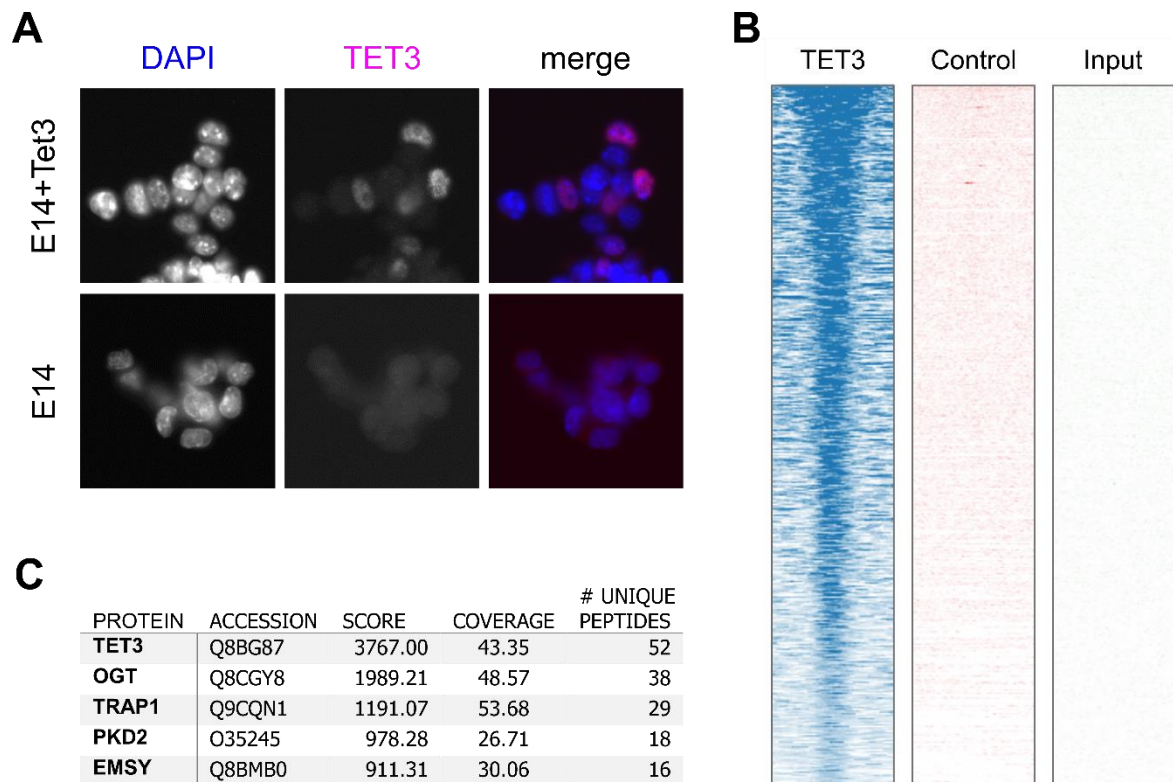

## Supplementary Figure S2 legend

A) Immunofluorescence imaging using anti-TET3 antibody (ABE290) in cells stably transfected with a Tet3 overexpression plasmid (pIG414, see Table S6) and untransfected E14 cells as described in Material and Methods, Nascent Transcription Assay. Images were taken on an Olympus BX61 epifluorescence microscope. Nuclear TET3 signal is only present in transfected cells.

B) Aligned probes plot covering MACS peaks and 1 kb upstream and downstream regions. MACS peaks were called on Tet3 overexpressing ES cells. Each horizontal line corresponds to one genomic region and ChIP-seq reads are represented by density of colour. Regions are sorted by intensity of TET3 signal. TET3 (blue lines): TET3 ChIP-seq signal (antibody Millipore ABE290) in cell transfected with a Tet3 expression construct, Control (red lines): TET3 ChIP-seq signal (ABE290) in cells transfected with a control construct (same vector backbone, containing a small part of the Tet3 gene excluding the epitope encoding region), Input (green lines): ChIP input material before antibody pull-down. Regions showing an enrichment for ABE290 pull-down in Tet3 overexpressing cells only show background signal in cells overexpressing a control construct. Input material shows hardly any signal.

C) Table of the five most frequently found proteins by rapid immunoprecipitation mass spectrometry of endogenous proteins (RIME, Mohammed et al. 2016) with anti-TET3 antibody (Millipore ABE290) but not with normal rabbit IgG (Santa Cruz Biotechnology sc-2027). TET3 is the most frequent protein found, followed by its known interactor OGT.

**Table S1: Genes differentially expressed between Tet3 expressing and control cells**

| GENE       | ID                 | DESCRIPTION                                         | LOG <sub>2</sub> FC | FDR      |
|------------|--------------------|-----------------------------------------------------|---------------------|----------|
| GM10222    | ENSMUSG00000067736 | predicted gene 10222                                | -2.6                | 6.38E-11 |
| SFRP2      | ENSMUSG00000027996 | secreted frizzled-related protein 2                 | -2.5                | 3.14E-07 |
| PHLDA2     | ENSMUSG00000010760 | pleckstrin homology-like domain, family A, member 2 | -2.2                | 3.01E-07 |
| BAHCC1     | ENSMUSG00000039741 | BAH domain and coiled-coil containing 1             | -2.1                | 2.53E-07 |
| PTCH1      | ENSMUSG00000021466 | patched homolog 1                                   | -1.9                | 4.92E-11 |
| GM4027     | ENSMUSG00000092019 | predicted gene 4027                                 | 1.9                 | 0.04659  |
| RPL39L     | ENSMUSG00000039209 | ribosomal protein L39-like                          | 2.4                 | 3.56E-07 |
| AC140240.1 | ENSMUSG00000096528 | Putative uncharacterized protein                    | 2.9                 | 1.26E-16 |
| PRAMEL7    | ENSMUSG00000025839 | preferentially expressed antigen in melanoma like 7 | 3.1                 | 2.06E-13 |
| TET3       | ENSMUSG00000034832 | tet methylcytosine dioxygenase 3                    | 6.1                 | 0        |

Log<sub>2</sub> fold-change (FC) for each gene was calculated from the mean reads per million (RPM) for three replicates of Tet3 overexpressing versus control cells. Negative fold-change reflects downregulation upon Tet3 overexpression. False discovery rate (FDR) is taken from DESeq2 statistics.

**Table S2: Proteins identified by TET3 RIME**

Proteins identified by mass spectrometry after immunoprecipitation with anti-TET3 antibody but not with unspecific rabbit IgG. The table is given in a separate file.

**Table S3: Amino acid sequences of TET3 variants****TET3 (1714 aa)**

MFLPETPQQYAVEINAREGTGPWAQGATVKTGSELSVPDGPVPGQMDSGPVYHGDSRQLSTSGAPVNGAREPAGPGLLGA  
AGPWRVDQKPDWEAASGPTHAAARLEDAHDLVAFSAVAEAVSSYGALSTRLYETFNREMSREAGSNGRGRPRPESCSEGEDLD  
TLQTALALARHGMKPPNCTCDGPECPDFLEWLEGKIKSMAMEGGQGRPRLPGALPPSEAGLPAPSTRPPLLSSEVPQVPPLEG  
LPLSQSALSIAKEKNISLQTAIAIEALTQLSSALPQPSHSTSQASCPLPEALSPSAPFRSPQSYLRAPSWPVVPPEEHPSFAPDSPAF  
PPATPRPEFSEAWGTDTPPATPRNSWPVPRSPDPMAELEQLLSASDYIQSVFKRPEALPTKPKVKVEAPSSSPAPVSPISQR  
EAPLLSSEPDTHQKAQTALQQHLHHKRNLFLEQAQDASFPTSTEPQAPGWWAPPGSPAPRPPDKPPKEKKKKPPTPAGGPVG  
AEKTPPGIKTSVRKPIQIKKSRSDMQPLFLPVRQIVLEGLKPQASEGQAPLPAQLSVPPPASQGAASQSCATPLTPEPSLALFAP  
SPSGDSLPTQEMRSPSPMVALQSGSTGGPLPPADDKLEELIRQFEAEFGDSFGLPGPPSVPIQEPENQSTCLPAPESPATRS  
PKKIKIESSGAVTVLSTTCFHSEEGGQEATPTKAENPLTPTLSGFLESLKYLDTPTKSLDTPAKKAQSEFPTCDCVEQIVEKDEGP  
YYTHLGSQPTVASIRELMEDRYGEKGKAIRIEKVIYTGKEGKSSRGCPKAKWVIRRHTEELKLLCLRHRAGHHCCQNAVIVILILAW  
EGIPRSLGDTLYQELDTLRKYGNPSTRRCGLNDDRTCACQKQDPNTEGASFSFGCSWSMYFNGCKYARSKTPRKFRLTGDNP  
KEEEVLNRNSFQDLATEVAPLYKRLAPQAYQNQVTNEDVAIDCRLGLKEGRPFSGVTACMDFCACHAKDQHNLNGCTVVTCL  
TKEDNRCVQGQIPEDEQLHVLPLYKMASTDEFGSEENQNAKVSSGAIVLTAFPREVRLPEPAKSCRQRQLEARKAAAEEKKLQ  
KEKLSTPEIKQEALELAGVTTDPGLSLKGGSLQQSLKPSLKVEPQNHFSFKYSGNAVVESYVLGSCRPSDPYSMSVSYHSR  
YAQPGLASVNGFHSKYTLPSFGYGFSSNPVFPSSQFLGPSAWGHGGSGGSFEKKPDLHALHNSLNPAYGGAFAELPGQAVA

TDNHHPIPHHQQPAYPGPKEYLLPKVPQLHPASRDSPFAQSSSCYNRSIKQEPIDPLTQAESIPRDSAKMSRTPLPEASQNGGP  
SHLWGQYSGGSPMSPKRTNSVGGNWGVFPPGESPTIVPDKLNSFGASCLTPSHFPESQWGLFTGEGQQSAPHAGARLRGKP  
WSPCKFGNGTSALTGPSLTEKPWGMGTGDFNPALKGGPGFQDKLWNPVKVEEGRIPTPGANPLDKAWQAFGMPLSSNEKL  
FGALKSEEKLWDPFSLEEGTAEPPSKGVVKEEKSGPTVEEDEEELWSDSEHNFLDENIGGVAVAPAHCSILIECARRELHATTPL  
KKPNRCHPTRISLVFYQHKNLNQPNHGLALWEAKMKQLAERARQRQEEAARLGLGQQEAKLYGKKRWGGAMVAEPQHKE  
KKGAIPTRQALAMPTDSAVTVSSYAYTKVTGPYSRWI

### **TET3<sub>trunc</sub> (749 aa)**

MFLPETPQQYAVEINAREGTGPWAQGATVKTGSELSPVDGPVPGQMDSGPVYHGDSRQLSTSGAPVNGAREPAGPGLLGA  
AGPWRVDQKPDWEAASGPTHAAARLEDAHDLVAFSAVAEAVSSYGALSTRLYETFNREMSREAGSNGRGRPRPESCSEGEDLD  
TLQTALALARHGMKPPNCTCDGPECPDFLEWLEGKIKSMAMEGGQGRPRLPGALPPSEAGLPAPSTRPPLSSEVPQVPPLEG  
LPLSQSALSIAKEKNISLQTAIAIEALTQLSSALPQPSHSTSQASCPLPEALSPSAPFRSPQSYLRAPSWPVVPEEHPSFAPDSPAF  
PPATPRPEFSEAWGTDTPPATPRNSWPVPRSPDPMAELEQLLGSASDYIQSVFKRPEALPTKPKVKVEAPSSSPAPVPSPISQR  
EAPLLSSEPDTHQKAQTALQQHLHHKRNLFLEQAQDASFPTSTEPQAPGWWAPPGPSAPRPPDKPPKEKKKKPPTPAGGPVG  
AEKTTPIGKTSVRKPIQIKKSRSRDMQPLFLPVRQIVLEGLKPQASEGQAPLPAQLSVPPPASQGAASQSCATPLTPEPSLALFAP  
SPSGDSLLPPTQEMRSPSPMVALQSGSTGGPLPPADDKLEELIRQFEAEFGDSFGLPGPPSVPIQEPENQSTCLPAPESPATR  
PKKIKIESSGAVTVLSTTCFHSEEGGQEATPTKAENPLTPTLSGFLESPLKYLDTPTKSLDTPAKKAQSEFPTCDCV

### **TET3<sub>CXXC</sub> (1804 aa)**

MSQFQVPLAVQPDLSGLYDFPQGQVMVGGFQGPGLPMAGSETQLRGGGDGRKKRKRCGTCDPCRRENCGSCTSCTNRR  
THQICKLRKCEVLKKKAGLLKEVEINAREGTGPWAQGATVKTGSELSPVDGPVPGQMDSGPVYHGDSRQLSTSGAPVNGAR  
EPAGPGLLGAAGPWRVDQKPDWEAASGPTHAAARLEDAHDLVAFSAVAEAVSSYGALSTRLYETFNREMSREAGSNGRGRPR  
PESCSEGEDLDTLQTALALARHGMKPPNCTCDGPECPDFLEWLEGKIKSMAMEGGQGRPRLPGALPPSEAGLPAPSTRPPL  
LSSEVPQVPPLEGLPLSQSALSIAKEKNISLQTAIAIEALTQLSSALPQPSHSTSQASCPLPEALSPSAPFRSPQSYLRAPSWPVV  
PEEHPSFAPDSPAFPPATPRPEFSEAWGTDTPPATPRNSWPVPRSPDPMAELEQLLGSASDYIQSVFKRPEALPTKPKVKVE  
APSSSPAPVPSPISQREAPLLSSEPDTHQKAQTALQQHLHHKRNLFLEQAQDASFPTSTEPQAPGWWAPPGPSAPRPPDKPP  
KEKKKKPPTPAGGPVGAETTPGIKTSVRKPIQIKKSRSRDMQPLFLPVRQIVLEGLKPQASEGQAPLPAQLSVPPPASQGAAS  
QSCATPLTPEPSLALFAPSPSGDSLLPPTQEMRSPSPMVALQSGSTGGPLPPADDKLEELIRQFEAEFGDSFGLPGPPSVPIQEP  
ENQSTCLPAPESPATRSPKKIKIESSGAVTVLSTTCFHSEEGGQEATPTKAENPLTPTLSGFLESPLKYLDTPTKSLDTPAKKAQ  
SEFPTCDCVEQIVEKDEGPYYTHLGSPTVASIRELMEDRYGEKGKAIRIEKVIYTGKEGKSSRGCPKIAKWWIRRHTEELCLVR  
HRAGHHQNAVIVILILAWEGIPRSLGDTLYQELTDLTRKYGNPTSRRCGLNDDRTCACQGKDPNTCGASFSGCSWSMYFN  
GCKYARSKTPRKFRLTGDNPKKEEVLNRNSFQDLATEVAPLYKRLAPQAYQNQVTNEDVAIDCRLGLKEGRPFSGVTACMDFC  
AHAHKDQHNLNGCTVVCTLTKEDNRCVGQIPEDEQLHVLPLYKMASTDEFGSEENQNAKVSSGAIQVLTAFPREVRRLEP  
AKSCRQRQLEARKAAAEKKLQKEKLSTPEKIQEALELAGVTTDPGLSLKGGLSQQSLKPSLKVEPQNHFSSFKYSGNAVVESY  
SVLGSCRPSDPYSMSSVYSYHSRYAQPGLASVNGFHSKYTLPSFGYYGFSSNPVFPSSQFLGPSAWGHGGSGGSFEKKPDLHA  
LHNSLNPAYGGAFAELPGQAVATDNHHPIPHHQQPAYPGPKEYLLPKVPQLHPASRDSPFAQSSSCYNRSIKQEPIDPLTQ  
AESIPRDSAKMSRTPLPEASQNGGPPSHLWGQYSGGSPMSPKRTNSVGGNWGVFPPGESPTIVPDKLNSFGASCLTPSHFPES  
QWGLFTGEGQQSAPHAGARLRGKPWSPCKFGNGTSALTGPSLTEKPWGMGTGDFNPALKGGPGFQDKLWNPVKVEEGRI  
PTPGANPLDKAWQAFGMPLSSNEKLFGALKSEEKLWDPFSLEEGTAEPPSKGVVKEEKSGPTVEEDEEELWSDSEHNFLDE  
NIGGVAVAPAHCSILIECARRELHATTPLKKPNRCHPTRISLVFYQHKNLNQPNHGLALWEAKMKQLAERARQRQEEAARLGL  
GQQEAKLYGKKRWGGAMVAEPQHKEKKGAIPTRQALAMPTDSAVTVSSYAYTKVTGPYSRWI

**Table S4: Proteins identified by TET3 SILAC RIME**

| DESCRIPTION                                                                                   | LOG <sub>2</sub> RATIO<br>(TET3/TET3 <sub>TRUNC</sub> ) |
|-----------------------------------------------------------------------------------------------|---------------------------------------------------------|
| C-Jun-amino-terminal kinase-interacting protein 3 [JIP3_MOUSE]                                | 6.014306                                                |
| UDP-N-acetylglucosamine--peptide N-acetylglucosaminyltransferase 110 kDa subunit [OGT1_MOUSE] | 4.438169                                                |
| ATP-dependent RNA helicase DDX3Y [DDX3Y_MOUSE]                                                | 2.639674                                                |
| Serine/arginine repetitive matrix protein 1 [SRRM1_MOUSE]                                     | 2.55985                                                 |
| Serine/arginine repetitive matrix protein 2 [SRRM2_MOUSE]                                     | 2.341055                                                |
| Small ubiquitin-related modifier [SUMO2_MOUSE]                                                | 2.257824                                                |
| Histone H2A type 1-H [H2A1H_MOUSE]                                                            | 2.180717                                                |
| Serine/arginine-rich splicing factor 3 [SRSF3_MOUSE]                                          | 2.167112                                                |
| Histone H1.2 [H12_MOUSE]                                                                      | 2.107027                                                |
| Plasminogen activator inhibitor 1 RNA-binding protein [PAIRB_MOUSE]                           | 2.060282                                                |
| Serine/arginine-rich splicing factor 2 [SRSF2_MOUSE]                                          | 2.048302                                                |
| Insulin-like growth factor 2 mRNA-binding protein 1 [IF2B1_MOUSE]                             | 2.040219                                                |
| Probable ATP-dependent RNA helicase DDX5 [DDX5_MOUSE]                                         | 1.991832                                                |
| Nucleophosmin [NPM_MOUSE]                                                                     | 1.975577                                                |
| Polycystin-2 [PKD2_MOUSE]                                                                     | 1.9628                                                  |
| Serine/arginine-rich splicing factor 5 [SRSF5_MOUSE]                                          | 1.956321                                                |
| Histone H2AX [H2AX_MOUSE]                                                                     | 1.939331                                                |
| Peroxisome oxidoreductin-1 [PRDX1_MOUSE]                                                      | 1.922404                                                |
| Serine/arginine-rich splicing factor 7 [SRSF7_MOUSE]                                          | 1.863931                                                |
| Nucleolin [NUCL_MOUSE]                                                                        | 1.82439                                                 |
| Histone H2A.Z [H2AZ_MOUSE]                                                                    | 1.791866                                                |
| Histone H3.3C [H3C_MOUSE]                                                                     | 1.783167                                                |
| Caprin-1 [CAPR1_MOUSE]                                                                        | 1.772848                                                |
| RNA-binding protein 8A [RBM8A_MOUSE]                                                          | 1.769339                                                |
| T-complex protein 1 subunit theta [TCPQ_MOUSE]                                                | 1.766596                                                |
| Histone H4 OS=Mus musculus [H4_MOUSE]                                                         | 1.752685                                                |
| Nuclease-sensitive element-binding protein 1 [YBOX1_MOUSE]                                    | 1.738551                                                |
| T-complex protein 1 subunit beta [TCPB_MOUSE]                                                 | 1.719965                                                |
| Glyceraldehyde-3-phosphate dehydrogenase [G3P_MOUSE]                                          | 1.713721                                                |
| Eukaryotic initiation factor 4A-I [IF4A1_MOUSE]                                               | 1.680657                                                |
| Probable tRNA(His) guanylyltransferase [THG1_MOUSE]                                           | 1.627772                                                |
| Histone H2B type 1-F/J/L [H2B1F_MOUSE]                                                        | 1.619335                                                |
| Transcription intermediary factor 1-beta [TIF1B_MOUSE]                                        | 1.601965                                                |
| Heat shock cognate 71 kDa protein [HSP7C_MOUSE]                                               | 1.599317                                                |
| T-complex protein 1 subunit zeta [TCPZ_MOUSE]                                                 | 1.57674                                                 |
| Elongation factor 1-alpha 1 [EF1A1_MOUSE]                                                     | 1.553169                                                |
| Guanine nucleotide-binding protein subunit beta-2-like 1 [GBLP_MOUSE]                         | 1.51742                                                 |
| Heat shock protein HSP 90-alpha [HS90A_MOUSE]                                                 | 1.465976                                                |
| Elongation factor 1-delta [EF1D_MOUSE]                                                        | 1.454056                                                |
| Tubulin beta-5 chain [TBB5_MOUSE]                                                             | 1.409618                                                |
| Tubulin alpha-1C chain [TBA1C_MOUSE]                                                          | 1.403313                                                |
| Protein NipSnap homolog 2 [NIPS2_MOUSE]                                                       | 1.399752                                                |

|                                                     |          |
|-----------------------------------------------------|----------|
| Poly(rC)-binding protein 1 [PCBP1_MOUSE]            | 1.377707 |
| T-complex protein 1 subunit delta [TCPD_MOUSE]      | 1.337047 |
| Heat shock protein HSP 90-beta SV=3 - [HS90B_MOUSE] | 1.315124 |
| Protein NipSnap homolog 1 [NIPS1_MOUSE]             | 1.309429 |
| Peptidyl-prolyl cis-trans isomerase A [PPIA_MOUSE]  | 1.246036 |
| Pyruvate kinase PKM [KPYM_MOUSE]                    | 1.231414 |
| Alpha-enolase [ENOA_MOUSE]                          | 1.217688 |
| Histone H1.5 [H15_MOUSE]                            | 1.214584 |
| Elongation factor 2 [EF2_MOUSE]                     | 1.151521 |
| Methylcytosine dioxygenase TET3 [TET3_MOUSE]        | 0        |
| Tubulin beta-4B chain [TBB4B_MOUSE]                 | -0.26751 |
| TBC1 domain family member 15 SV=1 - [TBC15_MOUSE]   | -0.8505  |
| Desmoglein-1-alpha [DSG1A_MOUSE]                    | -1.30234 |
| Stress-70 protein, mitochondrial [GRP75_MOUSE]      | -1.58131 |
| Cofilin-1 [COF1_MOUSE]                              | -1.65336 |
| Elongation factor 1-gamma [EF1G_MOUSE]              | -2.17254 |
| Serum albumin [ALBU_MOUSE]                          | -3.94989 |

For every protein the number of peptides found in the TET3 sample was divided by the number of peptides found in the TET3<sub>trunc</sub> samples, and normalised for the ratio of found TET3 peptides. The list was manually curated to exclude actins, keratins and ribosomal proteins.

**Table S5: Published TET3 loss of function models**

| STUDY                  | DELETED EXONS                                                |
|------------------------|--------------------------------------------------------------|
| (GU ET AL., 2011)      | 8-9 (correspond to exon 9-10 in ensembl Tet3-003 GRCm38.p5)  |
| (SANTOS ET AL., 2013)  | 5 (corresponds to exon 6 in ensembl Tet3-003 GRCm38.p5)      |
| (SHEN ET AL., 2014)    | 7-9 ((correspond to exon 8-10 in ensembl Tet3-003 GRCm38.p5) |
| (KANG ET AL., 2015)    | 2 (corresponds to exon 4 in ensembl Tet3-003 GRCm38.p5)      |
| (TSUKADA ET AL., 2015) | 3 (corresponds to exon 4 in ensembl Tet3-003 GRCm38.p5)      |
| (IQBAL ET AL., 2011)   | siRNA knockdown                                              |



**Table S6: Plasmids**

| PLASMID | PROMOTER         | TET3 VARIANT                              | REPORTER | SELECTION MARKER |
|---------|------------------|-------------------------------------------|----------|------------------|
| PIG201  | P <sub>TRE</sub> | oocyte (Tet3)                             | IRES GFP | puromycin        |
| PIG205  | P <sub>TRE</sub> | somatic (Tet3 <sub>CXXC</sub> )           | IRES GFP | puromycin        |
| PIG207  | P <sub>TRE</sub> | oocyte truncated (Tet3 <sub>trunc</sub> ) | IRES GFP | puromycin        |
| PIG208  | P <sub>TRE</sub> | catalytic domain                          | IRES GFP | puromycin        |
| PIG301  | CAG              | oocyte (Tet3)                             | none     | blastcidin       |
| PIG305  | CAG              | somatic (Tet3 <sub>CXXC</sub> )           | none     | blastcidin       |
| PIG307  | CAG              | oocyte truncated (Tet3 <sub>trunc</sub> ) | none     | blastcidin       |
| PIG409  | CAG              | oocyte truncated (Tet3 <sub>trunc</sub> ) | GFP      | blastcidin       |
| PIG410  | CAG              | exon 4                                    | GFP      | blastcidin       |
| PIG414  | CAG              | oocyte (Tet3)                             | GFP      | blastcidin       |
| PIG415  | CAG              | none                                      | GFP      | blastcidin       |

P<sub>TRE</sub> promoter is a CMV minimal promoter fused to tetO tetracycline-responsive elements which will drive high expression levels when bound by rtTA (reverse tetracycline transactivator). rtTA binds to its recognition sites in the presence of doxycycline. CAG is an artificial promoter made from the cytomegalovirus early enhancer element, the chicken beta-actin promoter, its first exon and intron and the rabbit beta-globin splice acceptor which drives high ubiquitous expression (Niwa et al., 1991; Okabe et al., 1997). Tet3 variants: oocyte isoform – denoted Tet3 in this study; somatic isoform – Tet3<sub>CXXC</sub>; oocyte truncated – Tet3<sub>trunc</sub>: truncated downstream of exon 4 producing a protein without a CXXC or a catalytic domain (aa 1-149 of TET3); catalytic domain – aa 750-1714 of TET3. GFP as reporter denotes a C-terminal GFP fusion, and IRES GFP indicates that GFP is present on the same transcript as the Tet3 variant, but translated from an internal ribosome entry site. pIG415 which does not contain the Tet3 gene but expresses GFP was used to establish control cell lines.

**Table S7: Total mapped read counts for sequencing samples**

| TYPE | SAMPLE                         | READ COUNT |
|------|--------------------------------|------------|
| CHIP | 301-1 (TET3)                   | 39395631   |
| CHIP | 301-3 (TET3)                   | 40954550   |
| CHIP | 305-1 (TET3 <sub>CXXC</sub> )  | 27415291   |
| CHIP | 305-2 (TET3 <sub>CXXC</sub> )  | 27903005   |
| CHIP | 305-3 (TET3 <sub>CXXC</sub> )  | 31638682   |
| CHIP | 307-1 (TET3 <sub>trunc</sub> ) | 32318079   |
| CHIP | 307-2 (TET3 <sub>trunc</sub> ) | 31777293   |
| CHIP | 307-3 (TET3 <sub>trunc</sub> ) | 37155694   |
| CHIP | Input                          | 27143389   |
| RNA  | 409-1 (TET3 <sub>trunc</sub> ) | 107046381  |
| RNA  | 409-2 (TET3 <sub>trunc</sub> ) | 96215158   |
| RNA  | 409-3 (TET3 <sub>trunc</sub> ) | 177757906  |
| RNA  | 414-1 (TET3)                   | 42078130   |
| RNA  | 414-2 (TET3)                   | 74766189   |
| RNA  | 414-3 (TET3)                   | 134326098  |
| RNA  | 415-1 (CTR)                    | 28318593   |
| RNA  | 415-2 (CTR)                    | 31997962   |
| RNA  | 415-3 (CTR)                    | 28557159   |
| ATAC | 414-1 (TET3)                   | 31037942   |
| ATAC | 414-2 (TET3)                   | 44266617   |
| ATAC | 414-3 (TET3)                   | 25623861   |
| ATAC | 415-1 (CTR)                    | 44837751   |
| ATAC | 415-2 (CTR)                    | 44594574   |
| ATAC | 414-3 (CTR)                    | 26622771   |
